# Supplementary material for: An ultra-thin polymer electrolyte based on single-helical-structured agarose for high performance solid-state lithium batteries
Source: Royal Society of Chemistry journal article supplement (doi:10.1039/d1ta08195k), 2021-01-01
Supplement: d1ta08195k1.pdf [file d1ta08195k1.pdf]

## Supporting Information

### **Ultra-thin Polymer Electrolyte Based on Single-Helical-Structured Agarose for High Performance Solid-State Lithium Batteries**

Xingzhao Zhang, Ying Chu\*, Ximing Cui, Yuxuan Li, and Qinmin Pan\*

State Key Laboratory of Robotics and Systems, School of Chemistry and Chemical Engineering, Harbin Institute of Technology, Harbin 150001, P. R. China

\*Corresponding author.

E-mail: [panqm@hit.edu.cn](mailto:panqm@hit.edu.cn)

E-mail: [chuying@hit.edu.cn](mailto:chuying@hit.edu.cn)

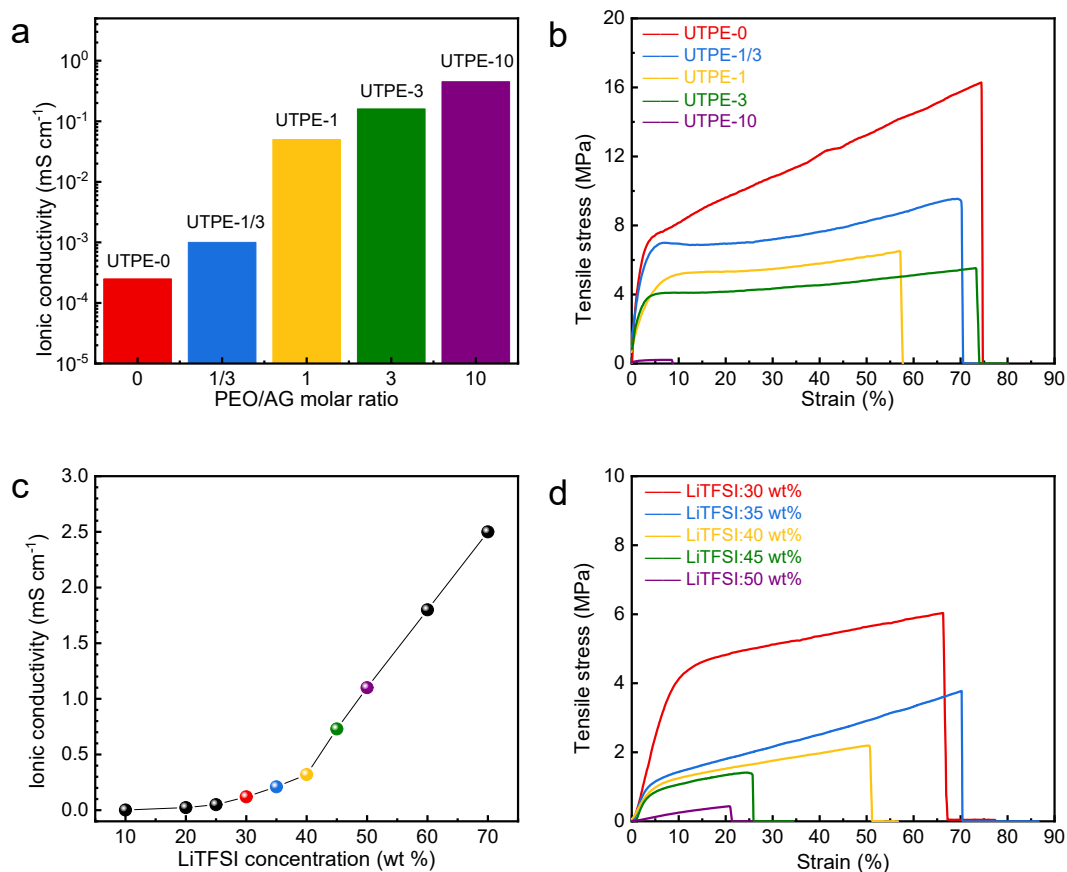

**Fig. S1.** (a) Ionic conductivity of UTPEs with different molar ratio of PEO/AG at room temperature (LiTFSI concentration: 30 wt%); (b) Stress-strain curves of UTPEs with different molar ratio of PEO/AG (LiTFSI concentration: 30 wt%); (c) Ionic conductivity of UTPEs with different concentrations of LiTFSI at room temperature (PEO/AG molar ratio: 3); (d) Stress-strain curves of UTPEs with different concentrations of LiTFSI (PEO/AG molar ratio: 3).

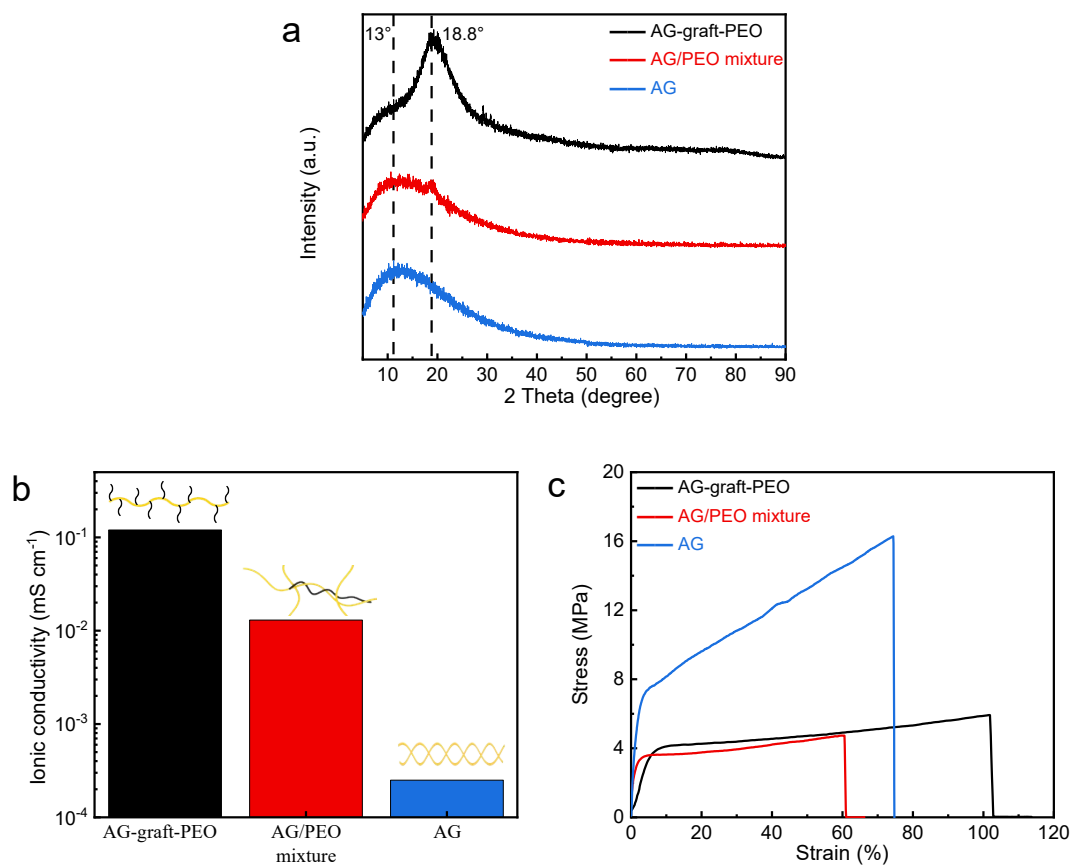

**Fig. S2.** (a) XRD pattern of AG-graft-PEO, AG/PEO-mixture and AG electrolytes; (b) Ionic conductivity of AG-graft-PEO, AG/PEO-mixture and AG electrolytes at room temperature; (c) Stress-strain curves of AG-graft-PEO, AG/PEO-mixture and AG electrolytes.

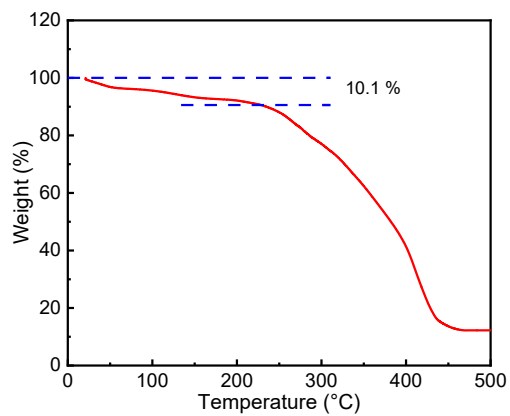

**Fig. S3.** Thermogravimetric curve of UTPE at a rate of  $5\text{ }^{\circ}\text{C min}^{-1}$ .

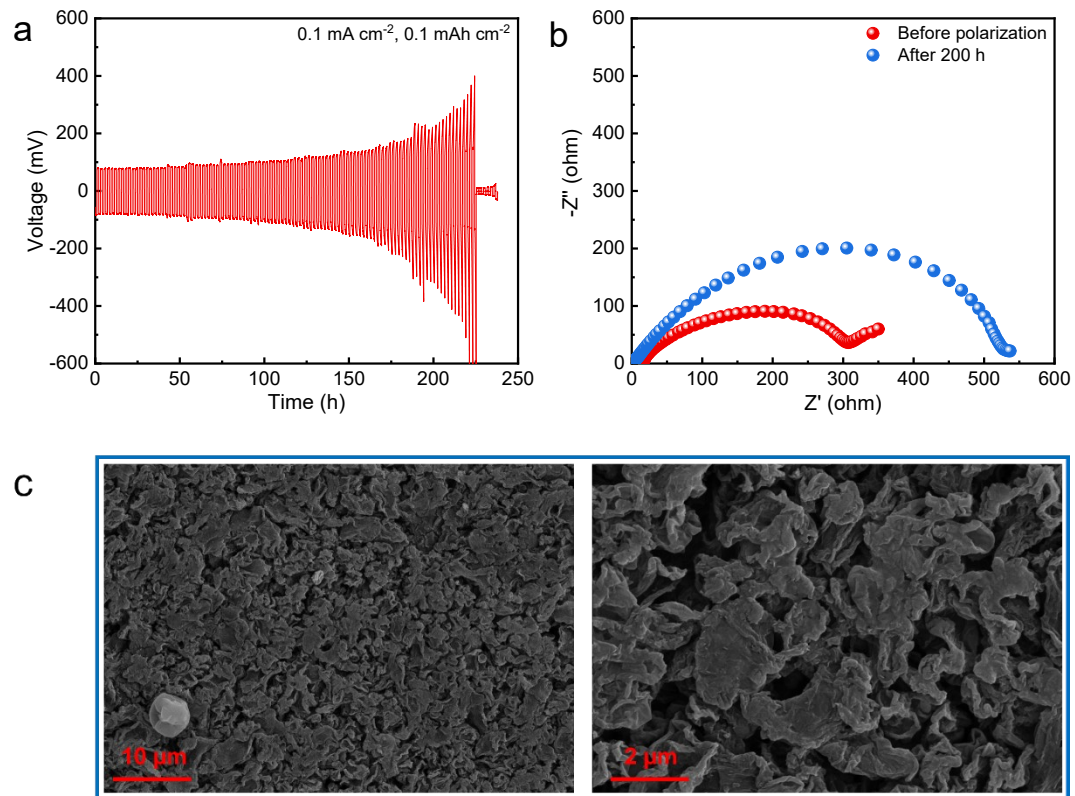

**Fig. S4.** (a) Galvanostatic Li plating/stripping profiles of Li symmetric cell with AG/PEO mixture electrolyte at room temperature ( $0.1 \text{ mAh cm}^{-1}$ ); (b) Alternating current impedance profiles of Li symmetric cell with AG/PEO mixture electrolyte at different cycles; (c) SEM images of the Li anode from Li symmetric cell with AG/PEO mixture electrolyte operating for 240 h at a current density of  $0.1 \text{ mAh cm}^{-1}$ .

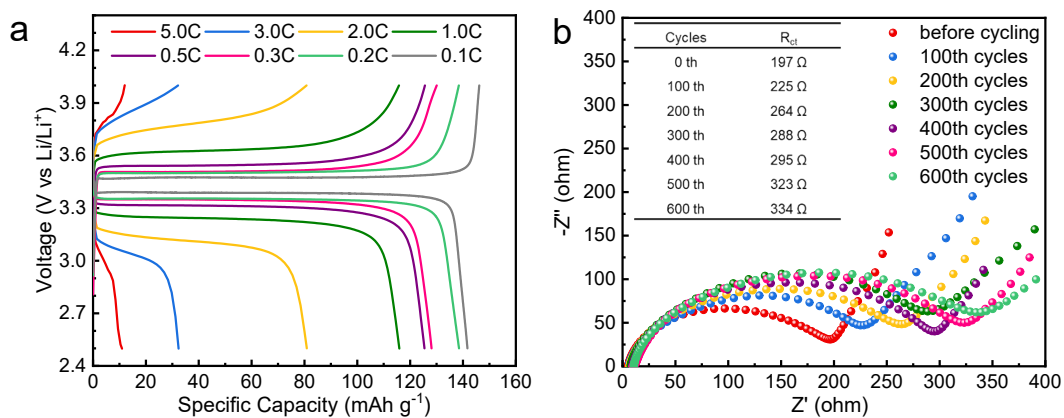

**Fig. S5.** (a) Voltage profiles of Li||LFP cell with 72  $\mu\text{m}$ -thick UTPE at different charging/discharging rates at room temperature (2.5-4.0 V); (b) Electrochemical impedance spectra of LFP||Li cell with 72  $\mu\text{m}$ -thick UTPE after different cycles.

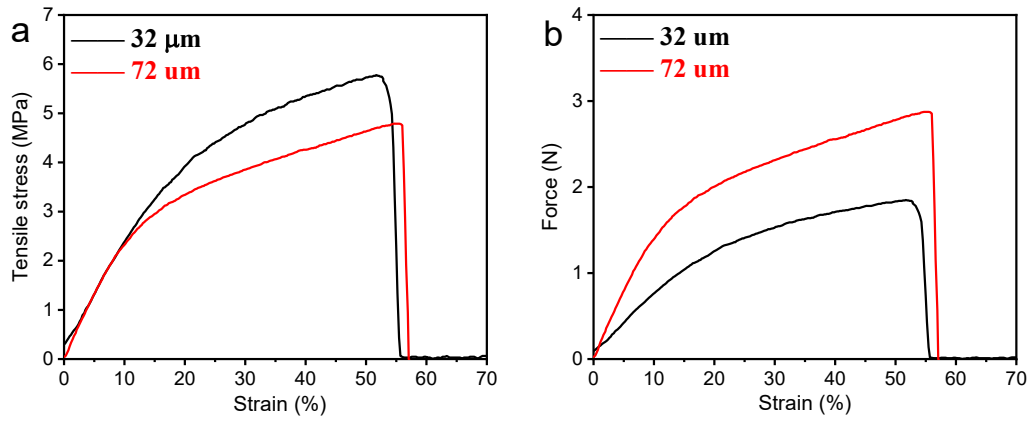

**Fig. S6.** (a) Stress-strain curves of 32 μm-thick and 72 μm-thick UTPE (b) Force-strain curves of 32 μm-thick and 72 μm-thick UTPE.

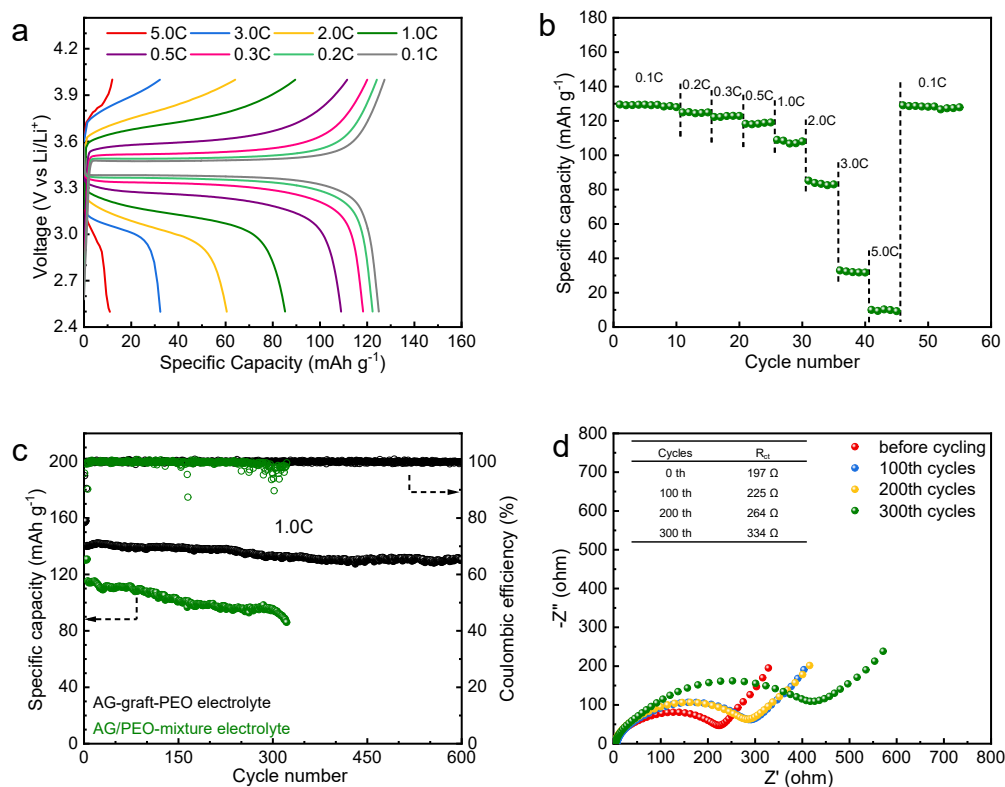

**Fig. S7.** (a) Rate performance of Li||LFP cells with 32  $\mu\text{m}$ -thick AG/PEO/LiTFSI mixture electrolyte at room temperature; (b) Voltage profiles of Li||LFP cell with 32  $\mu\text{m}$ -thick AG/PEO/LiTFSI mixture electrolyte at different charging/discharging rates at room temperature (2.5-4.0 V); (c) Discharge specific capacity and Coulombic efficiency of Li||LFP cells with AG-grafted-PEO and AG/PEO/LiTFSI mixture ultra-thin electrolytes at room temperature (1.0 C); (d) Electrochemical impedance spectra of LFP||Li cell with 32  $\mu\text{m}$ -thick AG/PEO/LiTFSI mixture electrolyte after different cycles.



**Table S1.** The electrochemical performance of Li batteries using different solid electrolytes.

| Composition                         | Thickness<br>( $\mu\text{m}$ ) | RT ionic conductivity<br>( $\text{S cm}^{-1}$ ) | Electrochemical performance<br>in LFP  Li cell at RT | Reference |
|-------------------------------------|--------------------------------|-------------------------------------------------|------------------------------------------------------|-----------|
| AG-graft-PEO<br>electrolyte         | 32                             | $1.2 \times 10^{-4}$                            | 131 $\text{mA h g}^{-1}$<br>(1.0 C, 600 cycles)      | This work |
| Crosslinked-PEGDE<br>on cellulose   | 30                             | $8.9 \times 10^{-5}$                            | 95 $\text{mA h g}^{-1}$<br>(0.1 C, 100 cycles)       | [1]       |
| PEO electrolyte on<br>PE separator  | 7.5                            | $3.7 \times 10^{-5}$                            | 108 $\text{mA h g}^{-1}$<br>(0.1 C, 50 cycles)       | [2]       |
| PEO electrolyte on<br>PI film       | 8.5                            | $2.3 \times 10^{-4}$                            | 100 $\text{mA h g}^{-1}$<br>(0.5 C, 60 cycles)       | [3]       |
| LLZTO/PTEE/SN<br>electrolyte        | 100                            | $1.2 \times 10^{-4}$                            | 135 $\text{mA h g}^{-1}$<br>(0.2 C, 200 cycles)      | [4]       |
| LPS/PEG-Ti<br>electrolyte           | 20                             | $1.6 \times 10^{-4}$                            | 103 $\text{mA h g}^{-1}$<br>(0.05 C, 8 cycles)       | [5]       |
| Crosslinked IL-<br>PVDF electrolyte | 32                             | $8.8 \times 10^{-4}$                            | 129 $\text{mA h g}^{-1}$<br>(1.0 C, 200 cycles)      | [6]       |

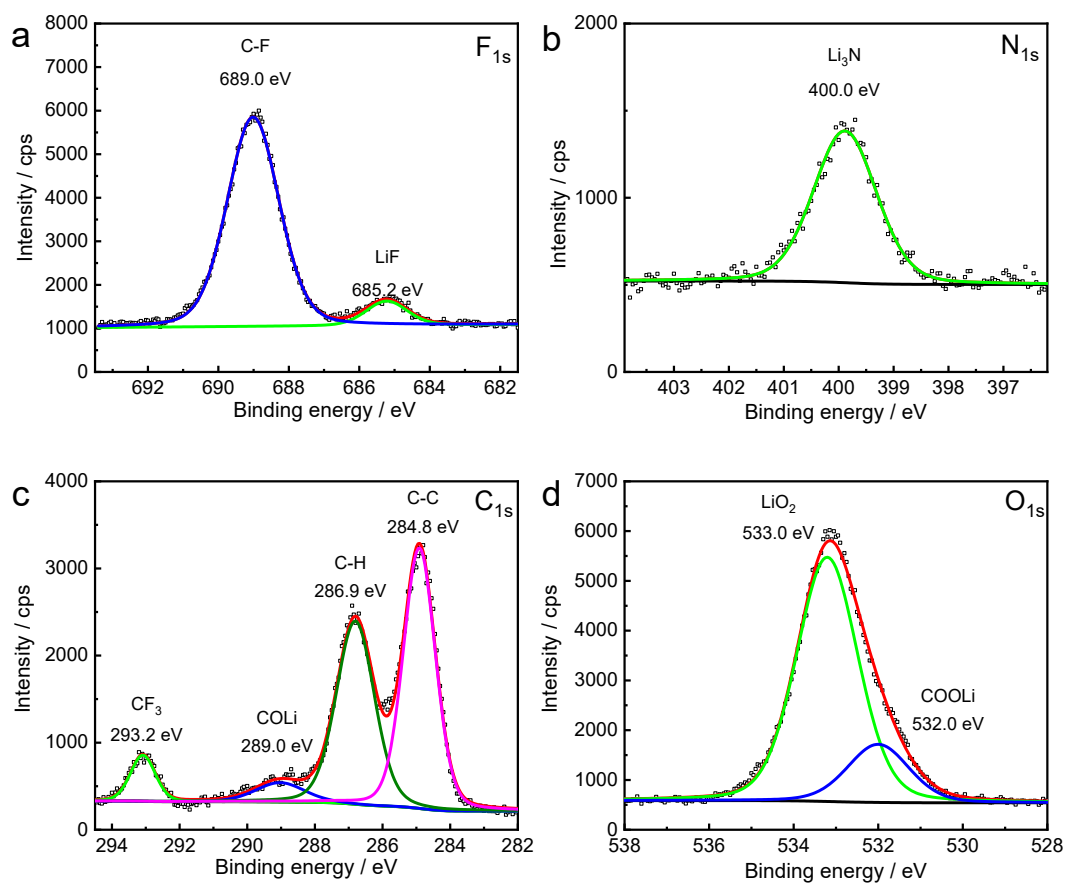

**Fig. S8.** XPS spectra of Li anode in LFP||Li cell with 32  $\mu\text{m}$ -thick UTPE after 600<sup>th</sup> cycles: (a)  $\text{F}_{1s}$ ; (b)  $\text{N}_{1s}$ ; (c)  $\text{C}_{1s}$ ; (d)  $\text{O}_{1s}$

## References

- [1] Y. Cui, X. Liang, J. Chai, Z. Cui, Q. Wang, W. He, X. Liu, Z. Liu, G. Cui, J. Feng, *Adv. Sci.*, 2017, **4**, 1700174.
- [2] J. Wu, Z. Rao, Z. Cheng, L. Yuan, Z. Li, Y. Huang, *Adv. Energy Mater.*, 2019, **9**, 1902767.
- [3] J. Wan, J. Xie, X. Kong, Z. Liu, K. Liu, F. Shi, H. Chen, W. Chen, J. Chen, X. Zhang, L. Zong, J. Wang, L. Chen, J. Qin, Y. Cui, *Nat. Nanotechnol.*, 2019, **14**, 705.
- [4] H. Duan, Y. X. Yin, Y. Shi, P. F. Wang, X. D. Zhang, C. P. Yang, J. L. Shi, R. Wen, Y. G. Guo, L. J. Wan, *J. Am. Chem. Soc.*, 2018, **140**, 82.
- [5] T. J. Cai, Y. H. Lo, J. J. Wu, *Mater. Today Energy*, 2019, **13**, 119.
- [6] Y. Yang, Q. Wu, D. Wang, C. C. Ma, Z. Chen, Q. T. Su, C. Z. Zhu, C. H. Li, *J. Membr. Sci.*, 2020, **612**, 118424.
